# Supplementary material for: Electro-conductively deposited carbon fibers for power controllable heating elements
Source: Royal Society of Chemistry journal article supplement (doi:10.1039/c5ra01296a), 2015-01-01
Supplement: c5ra01296a1.pdf [file c5ra01296a1.pdf]

**Supplementary Information for**

**Electro-Conductively Deposited Carbon Fiber for Power Controllable  
Heating Element**

Chang Hyo Kim<sup>1</sup>, Moo Sung Kim<sup>1</sup>, Yoong Ahm Kim<sup>1, 2, 3,\*</sup>, Kap Seung Yang<sup>1, 2\*\*</sup>, Seung Jo Baek<sup>4</sup>, Young-Jun Lee<sup>4</sup>, Cheol-Min Yang<sup>5</sup>, Yang Jin Lee<sup>5</sup>, Jun Yeon Hwang<sup>5</sup>

<sup>1</sup> Department of Polymer Engineering, Graduate School, Chonnam National University, 77 Yongbong-ro, Buk-gu, Gwangju 500-757, Korea

<sup>2</sup> School of Polymer Science and Engineering and Alan G. MacDiarmid Energy Research Institute, Chonnam National University, Yongbong-ro, Buk-gu, Gwangju, 500-757, Korea

<sup>3</sup> Institute for Biomedical Sciences, Interdisciplinary Cluster for Cutting Edge Research, Asahi 3-1-1, Matsumoto, Nagano 390-8621, Japan

<sup>4</sup> HAE Research Laboratory, LG Electronics, 327-23, Gasan-dong, Geumcheon-gu, Seoul, 153-802, Korea

<sup>5</sup> Institute of Advanced Composite Materials, Korea Institute of Science and Technology (KIST), Eunha-ri San 101, Bongdong-eup, Wanju-gun, Jeollabukdo 565-905, Korea

\*Corresponding authors: (Y.A.K.) Tel: +82-62-530-1871. Fax: +82-62-530-1779. E-mail: [yak@jnu.ac.kr](mailto:yak@jnu.ac.kr)

\*\* Corresponding author: (K.S.Y.) Tel: +82-62-530-1774, Fax: +82-62-530-1779, E-mail: [ksyang@jnu.ac.kr](mailto:ksyang@jnu.ac.kr)

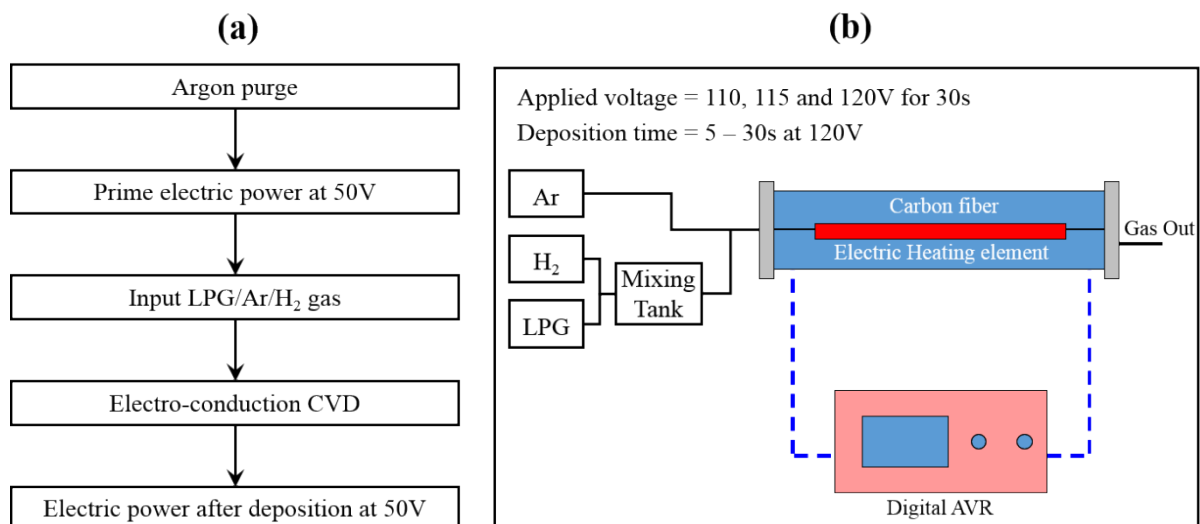

**Figure S1.** (a) Experimental procedure and (b) schematic illustration of electro-conductive chemical vapor deposition.

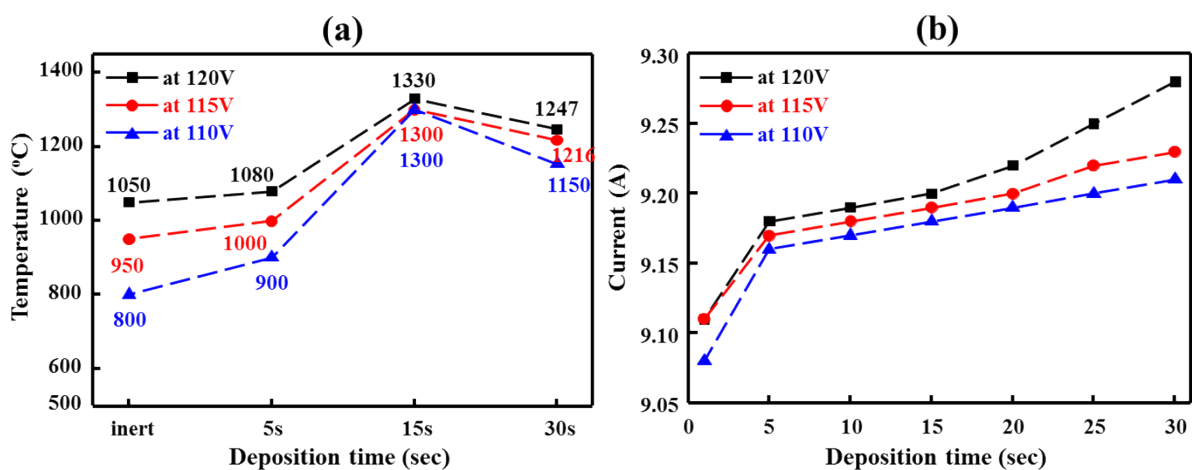

**Figure S2** The variation of (a) temperature and (b) current during electro-conductive CVD as a function of deposited time.

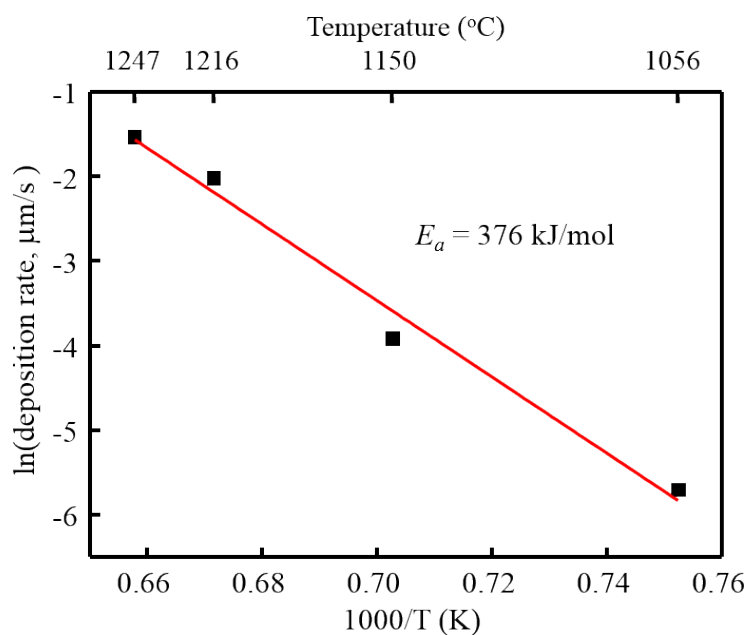

**Figure S3** Arrhenius plot of deposition rate on the surface of carbon fibers.

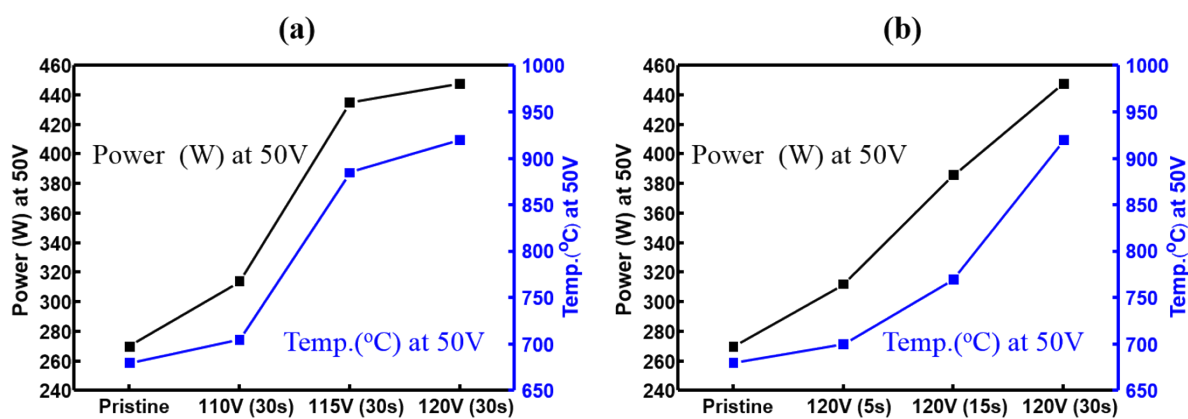

**Figure S4** Variations of power and temperature (at 50V) after electro-conductive CVD (a) as a function of applied voltage (where reaction time is fixed for 30s), and (b) as a function of deposition time (where applied voltage is fixed at 120 V)

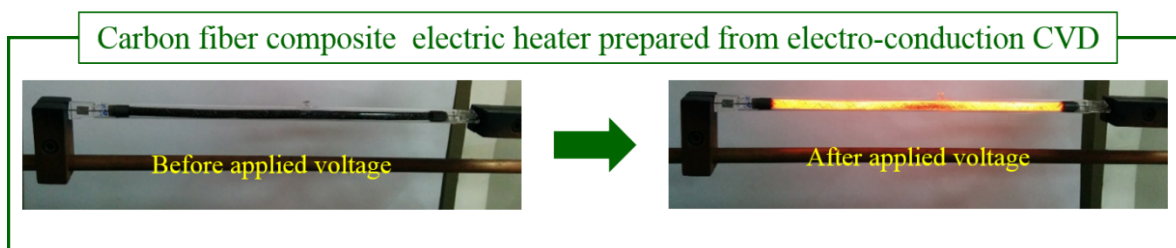

**Figure S5** Photos showing assembled carbon fiber composite electric heater using electro-conductive chemical vapor deposition before (a) and after applied voltage (b)
